# Supplementary material for: Worker Preferences for a Mental Health App Within Male-Dominated Industries: Participatory Study
Source: PubMed Central journal article supplement (PMC5943624; doi:10.2196/mental.8999), 2018-04-25
Supplement: mental_v5i2e30_app1.pdf [file mental_v5i2e30_app1.pdf]

## Design Outline for Participatory Workshops

**Aim of project:** To develop a web-based support tool that will help workers in male-dominated workplaces to: 1) better understand their mental health risk, 2) better manage and respond to mental health issues.

| Activity/Method                                                             | Min | Description                                                                                                                                                                                                                                                                        | Materials                     | Artefacts                                                                                                                            | Outcomes                                                                                                                                                                                                                                                                                                                                                                                                                                                   |
|-----------------------------------------------------------------------------|-----|------------------------------------------------------------------------------------------------------------------------------------------------------------------------------------------------------------------------------------------------------------------------------------|-------------------------------|--------------------------------------------------------------------------------------------------------------------------------------|------------------------------------------------------------------------------------------------------------------------------------------------------------------------------------------------------------------------------------------------------------------------------------------------------------------------------------------------------------------------------------------------------------------------------------------------------------|
| <b>Opener</b>                                                               | 15  | <ol style="list-style-type: none"> <li>1. Ask everyone to say their name and mention an app they like or use frequently.</li> <li>2. Summary of why we're here, their expertise, and what they'll be co-designing/contributing to.</li> </ol>                                      | Flipchart, markers, stickies  | List of favourite apps                                                                                                               |                                                                                                                                                                                                                                                                                                                                                                                                                                                            |
| <b>Mental health and firefighters</b><br>(customisation of the 4C's method) | 30  | <p>Participants are asked to add ideas using sticky notes to each of four quadrants on a chart: 1. Challenges, 2. Supports/Strengths, 3. Ideal/Objective, 4. Who's involved/effected).</p> <p>In the last 15 minutes, results are clustered and discussed in the larger group.</p> | Flipchart, markers, stickies. | Chart of perspectives on different angles of the problem of mental health demonstrating various aspects of the issue & language use. | <ul style="list-style-type: none"> <li>• Personal identity as a firefighter</li> <li>• How people think about risks and risks to their health,</li> <li>• Attitudes towards stress,</li> <li>• What do they take into account with their health</li> <li>• What things do they consider changing?</li> <li>• Language they use around stress/mental health;</li> <li>• How to communicate risk factors in a language that they will appreciate.</li> </ul> |

|                                       |    |                                                                                                                                                                                                                                                                                                                                                                                                                                       |                                                                                                                                                                                              |                                                                                                                                 |                                                                                                                                                                                                                                                                                                   |
|---------------------------------------|----|---------------------------------------------------------------------------------------------------------------------------------------------------------------------------------------------------------------------------------------------------------------------------------------------------------------------------------------------------------------------------------------------------------------------------------------|----------------------------------------------------------------------------------------------------------------------------------------------------------------------------------------------|---------------------------------------------------------------------------------------------------------------------------------|---------------------------------------------------------------------------------------------------------------------------------------------------------------------------------------------------------------------------------------------------------------------------------------------------|
| <b>Heart Hand Mind</b>                | 30 | <p>Ask them to envision an app that they would actually be interested in using to get support for stress/mental health issues or goals</p> <p><b>Mind:</b> What would make it effective and useful;</p> <p><b>Hand:</b> What would make it practical and convenient;</p> <p><b>Heart:</b> what would make it emotionally engaging.</p> <p>They write their ideas on stickies and add them to the board. Then ideas are discussed.</p> | Pre-printed Poster with spaces for heart/hand/mind for the posting of ideas; sticky notes                                                                                                    | Poster with a list of clustered ideas generated by participants                                                                 | <ul style="list-style-type: none"> <li>• What is a meaningful way to feed back information to them about risk (percentage? visual?)</li> <li>• Preferences for conceptualisation of a mental health/mental wealth/wellbeing app</li> <li>• Preferred features, (eg. team competitions)</li> </ul> |
| <b>Flog it</b>                        | 30 | <p>In small groups, each group creates a draft advertisement for the app, revealing values, attractions and perceived benefits. (20 min)</p> <p>Each group presents their ad. (10min)</p>                                                                                                                                                                                                                                             | 3 packs of: Crafting materials such as magazines, images, glue and markers. Include various style graphics from apps, video games and websites. Also include variations on terms on cards. = | 1 co-created ad collage for each group showing perceived benefits, features and effective communication approaches to audience. | <ul style="list-style-type: none"> <li>• Preferred features,</li> <li>• Preferences for App communication</li> <li>• Language they use around stress/mental health;</li> <li>• Preferences for the look, feel, and attitude of a wellbeing app</li> </ul>                                         |
| <b>“Design the app” (wireframing)</b> | 30 | <p>In small groups, participants draw (or paste with provided screen objects) a number of screens of the app to show</p>                                                                                                                                                                                                                                                                                                              | Prototyping cut-outs (buttons, frames, sliders, etc.), mobile                                                                                                                                | A series of user-created screen wireframes                                                                                      | <ul style="list-style-type: none"> <li>• Preferred features</li> <li>• Preferences for App communication</li> <li>• Language they use around</li> </ul>                                                                                                                                           |

|                                         |         |                                                                                                               |                                     |  |                       |
|-----------------------------------------|---------|---------------------------------------------------------------------------------------------------------------|-------------------------------------|--|-----------------------|
|                                         |         | how it would work and what features it might have. (20min)<br>Groups then describe their screens (10 min)     | screen templates, pens and markers. |  | stress/mental health; |
| <b>Tips for the designers – closing</b> | 10      | Ask participants what advice they would give to the designers and developers of this app. Collate onto board. |                                     |  |                       |
| <b>Total Duration (hours)</b>           | 2.5 hrs |                                                                                                               |                                     |  |                       |

## Space Requirements

### Location options

- Go to them, eg. station - more convenient for them but may bias response by associating it with the organization)
- A union venue (may help reinforce intentions to support and include them)
- Community venue near a station
- University (potentially free but may be less convenient for them, and not on their turf)

### Room requirements

- **Campfire:** Area where a circle of seats can be made for whole group discussion and sharing.
- **Breakout tables** - where small groups can collaboratively write and work.
- **Walls for hanging** – Easily accessed walls on which flipcharts and posters can be posted with blue-tac. Enough space in front of the walls for participants to huddle around.
- **Fuel station** - Tables for food/drinks

## Materials (6-9 participants)

- Flipcharts with stand.
- Thick Markers – a box for each small group + 1 for facilitators (4)
- Pens (9)
- Sticky notes - 1 block per participant (9)
- A variety of magazines/Images (eg. clipart) for “Flog it”
- Feature & Term Cards (for “Flog It” to test terms and features we’re considering)
- Scissors (3)
- Glue (3)
- Pre-printed Poster with spaces for heart/hand/mind for the posting of ideas
- Magnetic Prototyping kit
- Fuel station: Candy, mints, water, juice, fruit, crackers, trail mix (beer?).
