# Supplementary material for: Worker Preferences for a Mental Health App Within Male-Dominated Industries: Participatory Study
Source: PubMed Central journal article supplement (PMC5943624; doi:10.2196/mental.8999), 2018-04-25
Supplement: mental_v5i2e30_app2.pdf [file mental_v5i2e30_app2.pdf]

## Appendix 1: Feature ideas generated via participatory design activities

| Feature theme                                   | Feature                                                                                   |
|-------------------------------------------------|-------------------------------------------------------------------------------------------|
| <b>Tools for relieving stress in the moment</b> |                                                                                           |
|                                                 | Mood-fix tool                                                                             |
|                                                 | Guided meditation/breathing exercises                                                     |
|                                                 | Games/puzzles                                                                             |
|                                                 | Ability to upload photos to cheer you up                                                  |
|                                                 | Techniques to modify negative thoughts/behaviour                                          |
|                                                 | A way to vent                                                                             |
| <b>Health and Fitness</b>                       |                                                                                           |
|                                                 | Recipes for mood "Food for thought"                                                       |
|                                                 | Info on the effects of food on mental wellbeing                                           |
|                                                 | Workouts / exercises (on video)                                                           |
|                                                 | Stats on your fitness                                                                     |
|                                                 | Sleep tracking                                                                            |
|                                                 | Information on Work, Health, and Safety                                                   |
| <b>Mood Tracking</b>                            |                                                                                           |
|                                                 | Mood tracker (ability to track moods over time)                                           |
|                                                 | Ability to record the causes of or activities triggering moods                            |
|                                                 | Graphs of Mood over time to show trends                                                   |
| <b>Assessment and diagnostic tools</b>          |                                                                                           |
|                                                 | Self-assessment quiz with feedback (to indicate current state of wellbeing/mental health) |
|                                                 | Suggestions for what you can do based on self-assessments                                 |
|                                                 | List of signs and symptoms to look out for (for different mental health problems)         |
|                                                 | Help with assessing someone you're concerned about                                        |
|                                                 | Tracking of multiple of assessments to progress how you're doing over time.               |
| <b>External links</b>                           |                                                                                           |
|                                                 | Links to mental health organisations                                                      |
|                                                 | Links to employer-provided resources (eg, Chaplain, Employee Assistance Program)          |
| <b>Social features</b>                          |                                                                                           |
|                                                 | Chat with a professional                                                                  |
|                                                 | Connect to other users within the app (eg, dedicated forum)                               |
|                                                 | Way for family to check in on you throughout the day                                      |
|                                                 | Connection to people who have opted to be a resource for others (experienced peers).      |
|                                                 | Ability to like/share a section you find useful                                           |

|                                               |                                                                                                                                                      |
|-----------------------------------------------|------------------------------------------------------------------------------------------------------------------------------------------------------|
| <b>Testimonials &amp; endorsements</b>        |                                                                                                                                                      |
|                                               | Facility for people to provide and view testimonials of the app                                                                                      |
|                                               | Endorsement of app by respected individuals.                                                                                                         |
| <b>Psycho-education and coping strategies</b> |                                                                                                                                                      |
|                                               | Guidance on how to deal with specific situations that occur on the job<br>(traumatic work incidents, difficult members of the public, death, injury) |
|                                               | Guidance on how to have mental health discussions (with friends/family)                                                                              |
| <b>Personalisation and progress</b>           |                                                                                                                                                      |
|                                               | Personal information that allows app to be customised.                                                                                               |
|                                               | A dashboard that shows progress (eg, quiz stats, exercises completed)                                                                                |
|                                               | Challenges and goals                                                                                                                                 |
|                                               | Ability for the app to know when you're at work/on shift.                                                                                            |
| <b>Physiological sensors</b>                  |                                                                                                                                                      |
|                                               | Heart rate monitor                                                                                                                                   |
|                                               | Voice recognition of stress                                                                                                                          |
|                                               | Facial recognition of stress                                                                                                                         |
| <b>Notifications and reminders</b>            |                                                                                                                                                      |
|                                               | Prompts to retake self-assessment regularly (eg, "it's been x days since your last check-in.")                                                       |
|                                               | Alerts to fresh content in the app (egg, new exercises, games, videos)                                                                               |
|                                               |                                                                                                                                                      |
| <b>Ease-of-use features</b>                   |                                                                                                                                                      |
|                                               | First time user guidance                                                                                                                             |
|                                               | Help on how to use the app                                                                                                                           |
|                                               | Voice control (for use while driving)                                                                                                                |
|                                               | Adjusts for orientation of phone)                                                                                                                    |
|                                               |                                                                                                                                                      |
| <b>Other</b>                                  |                                                                                                                                                      |
|                                               | Brain training                                                                                                                                       |
|                                               | Easy access to emergency help.                                                                                                                       |
|                                               | Stories of lived experience (preferably video)                                                                                                       |
|                                               | Evidence that you're no alone (eg, 1 in 5 are feeling this way/have depression")                                                                     |
|                                               | Inspirational quote or thought of the day                                                                                                            |
|                                               | Facts and trivia                                                                                                                                     |
|                                               | List of ideas for what to do on your work breaks for rest                                                                                            |
